# Supplementary material
Source: Springer Nature journal article supplement (https://www.springermedizin.de/resource/supplementary/12881_2011_987_MOESM6_ESM.pdf/9451640)

**A**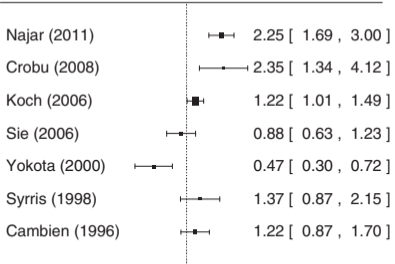

0.18 0.45 1.12 2.79 6.96

Odds Ratio

**B**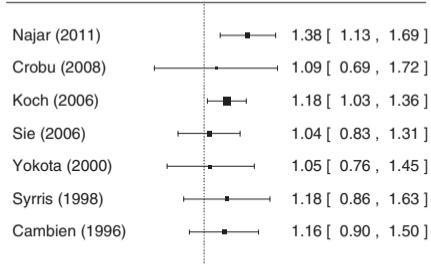

0.58 0.79 1.09 1.51 2.08

Odds Ratio

**C**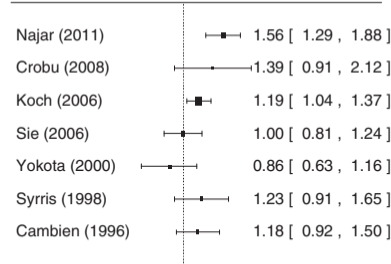

0.49 0.75 1.16 1.77 2.72

Odds Ratio

Supplement: MOESM6 [file 9451640]
